# Supplementary material for: Online supercritical fluid extraction mass spectrometry (SFE-LC-FTMS) for sensitive characterization of soil organic matter
Source: Royal Society of Chemistry journal article supplement (doi:10.1039/c9fd00011a), 2019-01-01
Supplement: c9fd00011a1.pdf [file c9fd00011a1.pdf]

Supplementary Information for “Online SFE-LC-FTMS for sensitive and comprehensive characterization of soil organic matter”

Yufeng Shen,<sup>1,3</sup> Rui Zhao,<sup>2</sup> Nikola Tolić,<sup>2</sup> Malak M. Tfaily,<sup>2,4</sup> Errol W. Robinson,<sup>1</sup> Rene Boiteau,<sup>2,5</sup> Ljiljana Paša-Tolić,<sup>2\*</sup> and Nancy J. Hess<sup>2\*</sup>

<sup>1</sup>Biological Sciences Division, and <sup>2</sup>Environmental Molecular Sciences Laboratory, Pacific Northwest National Laboratory, Richland, WA 99354, United States

<sup>3</sup>CoAnn Technologies, Richland, WA 99354, United States

<sup>4</sup>Department of Soil, Water and Environmental Science, University of Arizona, Tucson, AZ 85721-0038, United States

<sup>5</sup>College of Earth, Ocean and Atmospheric Sciences, Oregon State University, Corvallis, OR 97331, United States

Table S1. Comparison of the compounds assigned for high-C peat soil using SFE (CO<sub>2</sub>) and LSE with different solvents (MeOH, ACN, H<sub>2</sub>O and hexane)<sup>1</sup>. A) Compound classes of formulas assigned using FTICR MS, and B) compositional distribution.

A)

| Extraction method    | Lipid % | Unsaturated Hydrocarbon % | Protein % | Lignin % | Carbo-hydrate % | Amino sugar % | Tannin % | Condensed hydrocarbon % | Other % |
|----------------------|---------|---------------------------|-----------|----------|-----------------|---------------|----------|-------------------------|---------|
| SFE-CO <sub>2</sub>  | 54      | 4                         | 15        | 22       | 1               | 1             | 0        | 1                       | 2       |
| LSE-MeOH             | 44      | 5                         | 7         | 10       | 1               | 2             | 1        | 7                       | 23      |
| LSE-CAN              | 24      | 10                        | 3         | 16       | 1               | 0             | 3        | 14                      | 29      |
| LSE-H <sub>2</sub> O | 2       | 4                         | 11        | 33       | 9               | 5             | 6        | 10                      | 20      |
| LSE-hexane           | 54      | 3                         | 21        | 4        | 0               | 2             | 0        | 1                       | 14      |

B)

| Extraction method    | # of assigned formulas | CHO % | CHON % | CHOS % | CHOP % | CHONP % | CHOSP % | CHONS % | CHONSP % | Other % |
|----------------------|------------------------|-------|--------|--------|--------|---------|---------|---------|----------|---------|
| SFE-CO <sub>2</sub>  | 6414                   | 66    | 7      | 2      | 6      | 10      | 1       | 8       | 2        | 0       |
| LSE-MeOH             | 3135                   | 37    | 41     | 9      | 1      | 6       | 0       | 2       | 3        | 0       |
| LSE-ACN              | 3638                   | 37    | 24     | 9      | 3      | 9       | 2       | 8       | 8        | 0       |
| LSE-H <sub>2</sub> O | 2642                   | 40    | 39     | 2      | 0      | 5       | 5       | 7       | 0        | 0       |
| LSE-hexane           | 625                    | 54    | 14     | 12     | 3      | 7       | 2       | 5       | 3        | 0       |
| LSE Combined         | 5800                   | 46    | 30     | 6      | 1      | 6       | 3       | 6       | 3        | 0       |

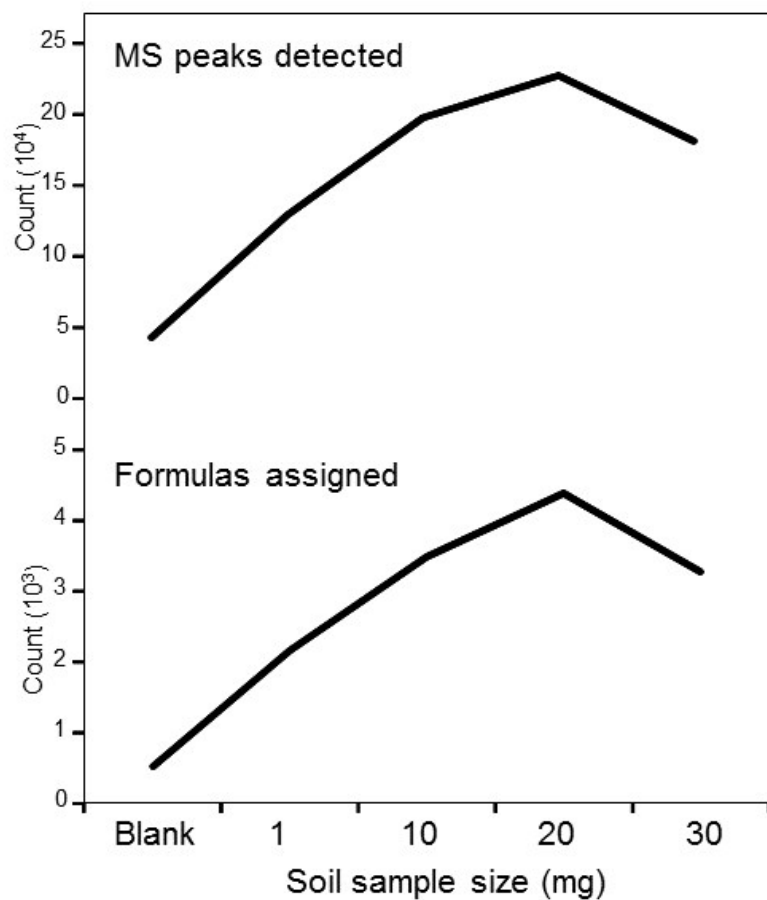

Figure S1. The number of MS peaks detected and molecular formulas assigned varied with the amount of soil available for extraction. The highest number of MS peaks detected and formulas assigned was attained with 20 mg of soil undergoing extraction. Experimental conditions are detailed in the text.

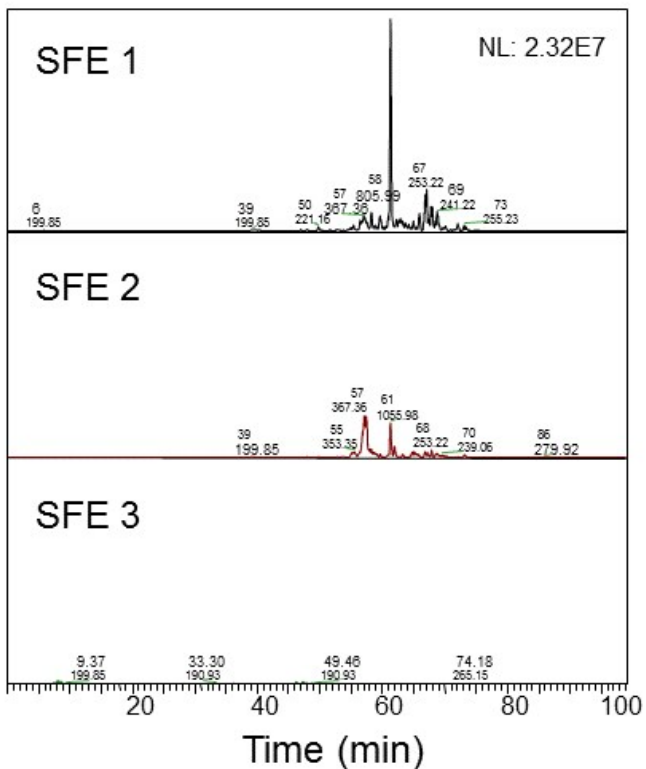

Figure S2. Recovery for SFE of low C soil. A SRS soil (20 mg) was extracted three times (SFE 1-3) and residues left after each extraction examined using LC-FTMS residues. The three LCMS base peak chromatograms are depicted at the same intensity scale (i.e.,  $2.32 \times 10^7$ ). Very little organic matter can be detected after the third extraction.

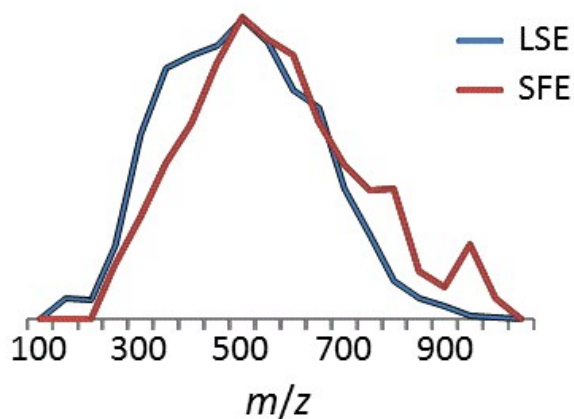

Figure S3. Comparison of the normalized  $m/z$  distribution of the molecular species identified by LSE and SFE techniques for high C peat. LSE preferentially extracts molecules with mass between  $300 < m/z < 400$  whereas SFE preferentially extracts molecules with  $m/z > 650$ .

- (1) Tfaily, M. M.; Chu, R. K.; Tolic, N.; Roscioli, K. M.; Anderton, C. R.; Pasa-Tolic, L.; Robinson, E. W.; Hess, N. J. Advanced solvent based methods for molecular characterization of soil organic matter by high-resolution mass spectrometry. *Analytical chemistry* **2015**, *87* (10), 5206.
